# Supplementary material for: Association between praziquantel treatment and cholangiocarcinoma: a hospital-based matched case–control study
Source: PubMed Central journal article supplement (PMC4619535; doi:10.1186/s12885-015-1788-6), 2015-10-24
Supplement: 12885_2015_1788_MOESM2_ESM.pdf [file 12885_2015_1788_MOESM2_ESM.pdf]

Study No: □□□□ ID-M: □□□□

ID-Matched: CO □□□□ to CO □□□□ (Please number)

|                                                   |                                                                             |
|---------------------------------------------------|-----------------------------------------------------------------------------|
| Age : □□ years (± 5 years)                        | Gender: <input type="checkbox"/> 1. Male <input type="checkbox"/> 2. Female |
| Date of admission (IPD): □□/□□/25 □□ (± 3 months) |                                                                             |

**Instruction:** Please mark  in the box you wish to answer. If the question asks for a number, please write the number in the box 

|   |   |   |   |   |   |   |   |   |   |
|---|---|---|---|---|---|---|---|---|---|
| 1 | 2 | 3 | 4 | 5 | 6 | 7 | 8 | 9 | 0 |
|---|---|---|---|---|---|---|---|---|---|

, large enough but not touching the box and one number per box. Please use either black or blue pen.

**Part 1 History of liver fluke infestation, taking praziquantel and other antihelminthic drugs, and chemical exposure**

**1.1 Question for those who have had stool examination and *Opisthorchis viverrini* (OV) eggs were found**

1.1.1 Have you ever had “**a stool examination**” and “**found OV. eggs**”?

- 1. Never (If this is the answer, skip to 1.2 on page 2)
- 2. I have had a stool examination and found OV. eggs
- 3. I have had a stool examination but OV. eggs were not found  
(If other parasites were found, please specify ..... ) (Skip to 1.2 on page 2)
- 9. Not Know/Not sure (Skip to 1.2 on page 2)

1.1.2 If you have had “**a stool examination**” and “**found OV. eggs**”, did you take “**Praziquantel**”? (Show the sample of praziquantel tablets and its packing to participate before answering the question)

- 1. No, praziquantel were taken (Skip to 1.3 on page 2)
- 2. Yes, praziquantel were taken
- 9. Don't know/Not sure

1.1.3 How many times did you take “**Praziquantel**”?

times (Please write the number of time, if not know give estimate)

1.1.4 How old were you the first time you took “**Praziquantel**”?

Age  years (Please write the number)

1.1.5 How long age was the last time you took “**Praziquantel**”?

- 1. Days →  days  2. Months →  months
- 3. Years →  years  9. Not know/Not sure

1.1.6 Normally each time you took praziquantel drugs was when you had “**a stool examination**” and “**found OV. eggs**”

- 1. Yes  2. No  9. Don't know/Not sure

1.1.7 Where did you get “**the Praziquantel**” from?

- 1. Self-bought  2. Local health authority  9. From other places, please specify.....

1.1.8 In one day, how many “**Praziquantel**” tablets do you take?

tablets/day (Please specify the number of tablets)

Study No: □□□□ ID-M: □□□□

**1.2 Question for those who “have never had stool examination BUT have taken praziquantel drugs”**

1.2.1 Have you ever taken “**Praziquantel**” “**without stool examination**” ?

1. Never (Skip to 1.3)                       2. Yes                       9. Don't know/Not sure

1.2.2 Within one day how many tablets of “**Praziquantel**” do you take?

tablets/day (Please specify the number of tablets)

1.2.3 How many times have you taken “**Praziquantel**”?

times (Please specify the number of times, if not know, estimate)

1.2.4 When was the last time did you “**take**” “**Praziquantel**”?

1. Days (Specify number)                       days  
 2. Months (Specify number)                       months  
 3. Years (Specify number)                       years  
 9. Don't know/Not sure

**1.3 Taking other antihelminthic drugs**

1.3.1 Have you ever taken antihelminthic drugs?

| Antihelminthic drugs<br>(Please specify e.g. trademark,<br>brands of antihelminthic drugs) | Number<br>of times<br>(Please<br>specify) | Frequency of taking                               |                          |                          |                          | How long<br>ago?<br>(Please<br>specify) |                         |
|--------------------------------------------------------------------------------------------|-------------------------------------------|---------------------------------------------------|--------------------------|--------------------------|--------------------------|-----------------------------------------|-------------------------|
|                                                                                            |                                           | per<br>day<br>(1)                                 | per<br>week<br>(2)       | per<br>month<br>(3)      | per<br>year<br>(4)       |                                         |                         |
| .....<br>.....<br>.....                                                                    | <input type="checkbox"/> 1. Yes           | <input type="checkbox"/> <input type="checkbox"/> | <input type="checkbox"/> | <input type="checkbox"/> | <input type="checkbox"/> | <input type="checkbox"/>                | .....<br>.....<br>..... |
| .....<br>.....<br>.....<br>.....<br>.....                                                  | <input type="checkbox"/> 2. No            |                                                   |                          |                          |                          |                                         |                         |

**1.4 Chemical exposure**

1.4.1 Have you ever done agricultural work such as farming **excluding** fishery, forestry or livestock?

1. Yes  
 2. No

Study No: □□□□ ID-M: □□□□

**1.4.2 Have you ever used herbicide?**

| Used of herbicide<br>(Please specify e.g. trademark, brands of herbicide) | Number of times<br>(Please specify)                                   | Frequency of using herbicide |                          |                          |                          | How long have you used herbicide?<br>(Please specify) |                         |
|---------------------------------------------------------------------------|-----------------------------------------------------------------------|------------------------------|--------------------------|--------------------------|--------------------------|-------------------------------------------------------|-------------------------|
|                                                                           |                                                                       | per day (1)                  | per week (2)             | per month (3)            | per year (4)             |                                                       |                         |
| .....<br>.....<br>.....                                                   | <input type="checkbox"/> 1. Yes<br><br><input type="checkbox"/> 2. No | □□                           | <input type="checkbox"/> | <input type="checkbox"/> | <input type="checkbox"/> | <input type="checkbox"/>                              | .....<br>.....<br>..... |

**1.4.3 Have you ever used rodenticide?**

| Used of rodenticide<br>(Please specify e.g. trademark, brands of rodenticide) | Number of times<br>(Please specify)                                   | Frequency of using rodenticide |                          |                          |                          | How long have you used rodenticide?<br>(Please specify) |                         |
|-------------------------------------------------------------------------------|-----------------------------------------------------------------------|--------------------------------|--------------------------|--------------------------|--------------------------|---------------------------------------------------------|-------------------------|
|                                                                               |                                                                       | per day (1)                    | per week (2)             | per month (3)            | per year (4)             |                                                         |                         |
| .....<br>.....<br>.....                                                       | <input type="checkbox"/> 1. Yes<br><br><input type="checkbox"/> 2. No | □□                             | <input type="checkbox"/> | <input type="checkbox"/> | <input type="checkbox"/> | <input type="checkbox"/>                                | .....<br>.....<br>..... |

**1.4.4 Have you ever used pesticide?**

| Used of pesticide<br>(Please specify e.g. trademark, brands of insecticide) | Number of times<br>(Please specify)                                   | Frequency of using pesticide |                          |                          |                          | How long have you used pesticide?<br>(Please specify) |                |
|-----------------------------------------------------------------------------|-----------------------------------------------------------------------|------------------------------|--------------------------|--------------------------|--------------------------|-------------------------------------------------------|----------------|
|                                                                             |                                                                       | per day (1)                  | per week (2)             | per month (3)            | per year (4)             |                                                       |                |
| .....<br>.....                                                              | <input type="checkbox"/> 1. Yes<br><br><input type="checkbox"/> 2. No | □□                           | <input type="checkbox"/> | <input type="checkbox"/> | <input type="checkbox"/> | <input type="checkbox"/>                              | .....<br>..... |

**1.4.5 Have you ever used fungicide?**

| Used of fungicide<br>(Please specify e.g. trademark, brands of fungicide) | Number of times<br>(Please specify)                                   | Frequency of using fungicide |                          |                          |                          | How long have you used fungicide?<br>(Please specify) |                         |
|---------------------------------------------------------------------------|-----------------------------------------------------------------------|------------------------------|--------------------------|--------------------------|--------------------------|-------------------------------------------------------|-------------------------|
|                                                                           |                                                                       | per day (1)                  | per week (2)             | per month (3)            | per year (4)             |                                                       |                         |
| .....<br>.....<br>.....                                                   | <input type="checkbox"/> 1. Yes<br><br><input type="checkbox"/> 2. No | □□                           | <input type="checkbox"/> | <input type="checkbox"/> | <input type="checkbox"/> | <input type="checkbox"/>                              | .....<br>.....<br>..... |

Study No: □□□□ ID-M: □□□□

**Part 2 General Information**

- 2.1 Height □□□.□ cm Weight □□.□ kg
- 2.2 What was your weight 5 years ago? □□.□ kg  9. Can't remember/Don't know
- 2.3 Comparing you present weight now and 5 years ago.  
 1. Increased  2. Decreased  3. The same
- 2.4 Marital Status  
 1. Single  2. Married  3. Widowed  4. Separated
- 2.5 Nationality  
 1. Thai  2. Chinese  3. Hill tribe people (Please specify).....  
 4. Others (Please specify).....
- 2.6 Religion  
 1. Buddhist  2. Christian  3. Moslem  4. Others (Please specify).....
- 2.7 Workplace (Please specify province)..... Postal code □□□□□
- 2.8 Present address (Please specify province)..... Postal code □□□□□  
 1. In town  2. Suburb
- 2.9 Place of birth (Please specify province)..... Postal code □□□□□
- 2.10 Native language  
 1. Dialect (E-san)  2. Thai  3. Chinese  4. Others (Please specify).....

**Part 3 Education and Occupation**

- 3.1 Have you ever attended school?  
 1. Yes  2. No (Skip to 3.3)
- 3.2 Highest level of education  
 1. Primary school  2. Secondary school  3. High school  
 4. Diploma  5. University  6. Others (Please specify).....
- 3.3 Current occupation  
 1. No job  2. Merchant  3. Factory worker  
 4. Laborer  5. Government official/State enterprise  6. Employee  
 7. Farmer  8. Others (Please specify).....
- 3.4 What was your longest occupation? (Please specify).....Duration  
(Please specify)..... □□ years
- 3.5 What is your current income per month (Only your income)? □□□□□ THB/month

Study No: □□□□ ID-M: □□□□

**Part 4 Smoking history**

4.1 Have you ever smoked in your life? (Please choose only one answer)

| Smoking History                       | Meaning                                          | Please specify number of cigarettes smoked per (Day/Month/Year) | Starting age | Stopping age |
|---------------------------------------|--------------------------------------------------|-----------------------------------------------------------------|--------------|--------------|
| <input type="checkbox"/> 1. Used to   | At least once a day and stopped more than a year | □□ /.....                                                       | □□           | □□           |
| <input type="checkbox"/> 2. Sometimes | Less than once a day                             | □□ /.....                                                       | □□           | □□           |
| <input type="checkbox"/> 3. Always    | At least once a day                              | □□ /.....                                                       | □□           | □□           |
| <input type="checkbox"/> 4. No        |                                                  |                                                                 |              |              |

4.2 If you did “**smoke**” or “**smoke always**”, what was your brand? (Choose one option)

1. Filtered government cigarettes     2. Non-filtered government cigarettes     3. Self-rolled  
 4. Tobacco chewing     5. Others (Please specify).....

4.3 Do you still smoke now?

1. Yes → number of cigarettes □□ (Please specify)  
per  1. Day  2. Month  3. Year  
 2. Stopped at age □□ years  
 9. Don't remember

**Part 5 Alcohol history**

5.1 Have your ever drunk alcohol in your life? Such as alcohol, rice whisky, beer, wine or local liquor

1. Yes     2. No (Skip to Part 6 number 6.1)

5.2 If you have drunk alcohol before, what is your preferred drink? (Please specify).....

5.3 From 5.2 please give details

| Do you still drink alcohol?     | Amount per day                                                                                                  | Unit per Day                                                                                                                                                                                 | Frequency                                                                                                                                                                                                                          | How long have you drunk alcohol? (Please specify) |
|---------------------------------|-----------------------------------------------------------------------------------------------------------------|----------------------------------------------------------------------------------------------------------------------------------------------------------------------------------------------|------------------------------------------------------------------------------------------------------------------------------------------------------------------------------------------------------------------------------------|---------------------------------------------------|
| <input type="checkbox"/> 1. Yes | □□ (Please specify)                                                                                             | <input type="checkbox"/> 1. Glass but not flask<br><input type="checkbox"/> 2. Flask<br><input type="checkbox"/> 3. Large bottle<br><input type="checkbox"/> 4. Others (Please specify)..... | <input type="checkbox"/> 1. Less than once a month<br><input type="checkbox"/> 2. 1-3 times /month<br><input type="checkbox"/> 3. 1 time /week<br><input type="checkbox"/> 4. 2-5 times /week<br><input type="checkbox"/> 5. Daily | □□ years                                          |
| <input type="checkbox"/> 2. No  | <i>If this is your answer please specify age of quitting. If you cannot remember, give an estimate □□ years</i> |                                                                                                                                                                                              |                                                                                                                                                                                                                                    |                                                   |

Study No: □□□□ ID-M: □□□□

**Part 6 Betel nut chewing history**

6.1 Have you ever chewed betel nuts?

- 1. Yes
- 2. No (Skip Part 7 number 7.1 page 6)

6.2 If you have chewed betel nuts before, please give the following details:

| Do you still chew betel nuts    | Amount chewed per time                                                                 | Betel nut unit                                                                                                                                                                        | Frequency of chewing                                                                                                                                                                                                          | How long have you chewed | Quitting age |
|---------------------------------|----------------------------------------------------------------------------------------|---------------------------------------------------------------------------------------------------------------------------------------------------------------------------------------|-------------------------------------------------------------------------------------------------------------------------------------------------------------------------------------------------------------------------------|--------------------------|--------------|
| <input type="checkbox"/> 1. Yes | □□<br>(Please specify)                                                                 | <input type="checkbox"/> 1. Day<br><input type="checkbox"/> 2. Month<br><input type="checkbox"/> 3. Year<br><input type="checkbox"/> 4. Other (Please specify).....<br>.....<br>..... | <input type="checkbox"/> 1. Less than once a month<br><input type="checkbox"/> 2. 1-3 time/month<br><input type="checkbox"/> 3. 1 time/week<br><input type="checkbox"/> 4. 2-5 time/week<br><input type="checkbox"/> 5. Daily | □□<br>years              | .....        |
| <input type="checkbox"/> 2. No  | <i>If this is your answer, please specify the age you stopped or estimate □□ years</i> |                                                                                                                                                                                       |                                                                                                                                                                                                                               |                          |              |

**Part 7 History of residential environment**

7.1 Last year, where was the toilet?

- 1. In the house
- 2. Outside the house/With roof and walls
- 3. No toilet

7.2 Last year what was your water source?

- 1. Tap water
- 2. Well water
- 3. River water
- 4. Others (Please specify).....

Study No: □□□□ ID-M: □□□□

**Part 8 History of eating local nitrite-containing foods and using herbs**

**8.1 Have you ever eaten the following foods?**

| Foods                                                 |                                                                   | Number of times | Frequency of eating |              |               |              | How many years age? (Please specify) |
|-------------------------------------------------------|-------------------------------------------------------------------|-----------------|---------------------|--------------|---------------|--------------|--------------------------------------|
|                                                       |                                                                   |                 | per day (1)         | per week (2) | per month (3) | per year (4) |                                      |
| 1) Salted fish water fresh, salted meat               | <input type="checkbox"/> 1. Yes<br><input type="checkbox"/> 2. No | □□              | □                   | □            | □             | □            | □□ years                             |
| 2) Raw fish, Partial raw fish (e.g. Lap-Pla, Koi-Pla) | <input type="checkbox"/> 1. Yes<br><input type="checkbox"/> 2. No | □□              | □                   | □            | □             | □            | □□ years                             |
| 3) Fermented product (e.g. Pla-chao, Pla-chom)        | <input type="checkbox"/> 1. Yes<br><input type="checkbox"/> 2. No | □□              | □                   | □            | □             | □            | □□ years                             |
| 4) Meat grill/smoked                                  | <input type="checkbox"/> 1. Yes<br><input type="checkbox"/> 2. No | □□              | □                   | □            | □             | □            | □□ years                             |
| 5) Chinese sausage/ other sausage                     | <input type="checkbox"/> 1. Yes<br><input type="checkbox"/> 2. No | □□              | □                   | □            | □             | □            | □□ years                             |
| 6) Pickled vegetables or fruits                       | <input type="checkbox"/> 1. Yes<br><input type="checkbox"/> 2. No | □□              | □                   | □            | □             | □            | □□ years                             |

**8.2 History of herb usage in the last 3 years**

| Herb usage history                                                                    |                                                                   | Number of time | Frequency of consumption |              |               |              |
|---------------------------------------------------------------------------------------|-------------------------------------------------------------------|----------------|--------------------------|--------------|---------------|--------------|
|                                                                                       |                                                                   |                | per day (1)              | per week (2) | per month (3) | per year (4) |
| 1) In last 3 years, have your ever used Chinese herbs or Thai herbs to treat illness? | <input type="checkbox"/> 1. Yes<br><input type="checkbox"/> 2. No | □□             | □                        | □            | □             | □            |

2) How long did you use the above mentioned herbs? □□ years □□ months (Please specify the number)

3) Please specify the name of herbs used.

.....

.....

.....

.....

Study No: □□□□ ID-M: □□□□

**Part 9 History of eating fermented fish (Pla-ra)**

**9.1 Eating fermented fish**

| Eating fermented fish                  |                                 | Number of times per month (Please specify)   | Frequency of eating fermented fish                                                                                                                                                                                            | How long have you eaten fermented fish? |
|----------------------------------------|---------------------------------|----------------------------------------------|-------------------------------------------------------------------------------------------------------------------------------------------------------------------------------------------------------------------------------|-----------------------------------------|
| 1) Have you ever eaten fermented fish? | <input type="checkbox"/> 1. Yes | □□                                           | <input type="checkbox"/> 1. Less than once a month<br><input type="checkbox"/> 2. 1-3 time/month<br><input type="checkbox"/> 3. 1 time/week<br><input type="checkbox"/> 4. 2-5 time/week<br><input type="checkbox"/> 5. Daily | □□ years                                |
|                                        | <input type="checkbox"/> 2. No  | <i>(Skip to part 10 number 10.1 page 10)</i> |                                                                                                                                                                                                                               |                                         |

**9.2 Type of fermented fish (Choose only one)**

| Type of fermented fish                                                                          |                                 | Number of times per month (Please specify) | Frequency of eating fermented fish                                                                                                                                                                                            | How long have you eaten fermented fish? |
|-------------------------------------------------------------------------------------------------|---------------------------------|--------------------------------------------|-------------------------------------------------------------------------------------------------------------------------------------------------------------------------------------------------------------------------------|-----------------------------------------|
| 1) Do you normally eat cooked fermented fish? (Including used for cooking or eating separately) | <input type="checkbox"/> 1. Yes | □□                                         | <input type="checkbox"/> 1. Less than once a month<br><input type="checkbox"/> 2. 1-3 time/month<br><input type="checkbox"/> 3. 1 time/week<br><input type="checkbox"/> 4. 2-5 time/week<br><input type="checkbox"/> 5. Daily | □□ years                                |
|                                                                                                 | <input type="checkbox"/> 2. No  |                                            |                                                                                                                                                                                                                               |                                         |
| 2) Do you normally eat raw fermented fish? (Including used for cooking or eating separately)    | <input type="checkbox"/> 1. Yes | □□                                         | <input type="checkbox"/> 1. Less than once a month<br><input type="checkbox"/> 2. 1-3 time/month<br><input type="checkbox"/> 3. 1 time/week<br><input type="checkbox"/> 4. 2-5 time/week<br><input type="checkbox"/> 5. Daily | □□ years                                |
|                                                                                                 | <input type="checkbox"/> 2. No  |                                            |                                                                                                                                                                                                                               |                                         |



Study No: □□□□ ID-M: □□□□

**9.2 Type of fermented fish (choose only one)**

| Type of fermented fish                             |                                 | Number of times per month (Please specify) | Frequency of eating fermented fish                                                                                                                                                                                            | How long have you eaten fermented fish? |
|----------------------------------------------------|---------------------------------|--------------------------------------------|-------------------------------------------------------------------------------------------------------------------------------------------------------------------------------------------------------------------------------|-----------------------------------------|
| 3) Do you normally eat half-cooked fermented fish? | <input type="checkbox"/> 1. Yes | □□                                         | <input type="checkbox"/> 1. Less than once a month<br><input type="checkbox"/> 2. 1-3 time/month<br><input type="checkbox"/> 3. 1 time/week<br><input type="checkbox"/> 4. 2-5 time/week<br><input type="checkbox"/> 5. Daily | □□ years                                |
|                                                    | <input type="checkbox"/> 2. No  |                                            |                                                                                                                                                                                                                               |                                         |

**9.3 Fermented fish source**

9.3.1 Where dose the fermented fish you eat come from? (Please choose only one answer)

| Fermented Fish source                               |                                                  | Amount of fermented fish per time (1 Haisong =30 kgs.) | Frequency of producing fermented fish                                                                                                                        |
|-----------------------------------------------------|--------------------------------------------------|--------------------------------------------------------|--------------------------------------------------------------------------------------------------------------------------------------------------------------|
| 1) Where dose the fermented fish you eat come from? | <input type="checkbox"/> 1. Self-made            | □□                                                     | <input type="checkbox"/> 1. per day<br><input type="checkbox"/> 2. per week<br><input type="checkbox"/> 3. per month<br><input type="checkbox"/> 4. per year |
|                                                     | <input type="checkbox"/> 2. Bought               | □□                                                     | <input type="checkbox"/> 1. per day<br><input type="checkbox"/> 2. per week<br><input type="checkbox"/> 3. per month<br><input type="checkbox"/> 4. per year |
|                                                     | <input type="checkbox"/> 3. Self-made and bought | □□                                                     | <input type="checkbox"/> 1. per day<br><input type="checkbox"/> 2. per week<br><input type="checkbox"/> 3. per month<br><input type="checkbox"/> 4. per year |

9.4 If you made the fermented fish, would you finish 1 Haisong (30 kgs.) in 1 year

1. Yes                                       2. No                                       9. Don't know/Not sure

9.5 How many people share the same Haisong of fermented fish? □□ People (Please specify number)

Study No: □□□□ ID-M: □□□□

9.6 How many adults? □□ people

9.7 How many children? (Age less than 12 years) □□ people

9.8 Do you still eat fermented fish?

1. Yes, □□ Times per day (Please specify number)

2. No, I stopped at age □□ years

9. Don't remember

**Part 10 Health history**

10.1 Do you have "**Viral hepatitis**"?

1. Yes     2. No (Skip to 10.3)     3. Don't know/Never investigated (Skip to 10.3)

10.2 If you have "**Viral hepatitis**", please give the following detail:

| Viral hepatitis                                        |                                 | Age Infection started | Viral hepatitis treated or non  | Type of treatment |
|--------------------------------------------------------|---------------------------------|-----------------------|---------------------------------|-------------------|
| 1) hepatitis A                                         | <input type="checkbox"/> 1. Yes | □□                    | <input type="checkbox"/> 1. Yes | .....             |
|                                                        | <input type="checkbox"/> 2. No  |                       | <input type="checkbox"/> 2. No  |                   |
| 2) hepatitis B                                         | <input type="checkbox"/> 1. Yes | □□                    | <input type="checkbox"/> 1. Yes | .....             |
|                                                        | <input type="checkbox"/> 2. No  |                       | <input type="checkbox"/> 2. No  |                   |
| 3) hepatitis C                                         | <input type="checkbox"/> 1. Yes | □□                    | <input type="checkbox"/> 1. Yes | .....             |
|                                                        | <input type="checkbox"/> 2. No  |                       | <input type="checkbox"/> 2. No  |                   |
| 4) unknown type of viral hepatitis                     | <input type="checkbox"/> 1. Yes | □□                    | <input type="checkbox"/> 1. Yes | .....             |
|                                                        | <input type="checkbox"/> 2. No  |                       | <input type="checkbox"/> 2. No  |                   |
| 5) others type (Please specify).....<br>.....<br>..... | <input type="checkbox"/> 1. Yes | □□                    | <input type="checkbox"/> 1. Yes | .....             |
|                                                        | <input type="checkbox"/> 2. No  |                       | <input type="checkbox"/> 2. No  |                   |

Study No: □□□□ ID-M: □□□□

10.3 Have you ever had the following diseases? (Not now)

| Diseases                         |                                 | Age of onset (years) | Is it recurring                                                                                             | Mode of Treatment                                                                                                                                           |
|----------------------------------|---------------------------------|----------------------|-------------------------------------------------------------------------------------------------------------|-------------------------------------------------------------------------------------------------------------------------------------------------------------|
| 1) Tuberculosis                  | <input type="checkbox"/> 1. Yes | □□                   | <input type="checkbox"/> 1. Yes<br><input type="checkbox"/> 2. No<br><input type="checkbox"/> 9. Don't know | <input type="checkbox"/> 1. Modern Medicine<br><input type="checkbox"/> 2. Traditional Medicine<br><input type="checkbox"/> 3. Others (Please specify)..... |
|                                  | <input type="checkbox"/> 2. No  |                      |                                                                                                             |                                                                                                                                                             |
| 2) Malaria                       | <input type="checkbox"/> 1. Yes | □□                   | <input type="checkbox"/> 1. Yes<br><input type="checkbox"/> 2. No<br><input type="checkbox"/> 9. Don't know | <input type="checkbox"/> 1. Modern Medicine<br><input type="checkbox"/> 2. Traditional Medicine<br><input type="checkbox"/> 3. Others (Please specify)..... |
|                                  | <input type="checkbox"/> 2. No  |                      |                                                                                                             |                                                                                                                                                             |
| 3) Cancer                        | <input type="checkbox"/> 1. Yes | □□                   | <input type="checkbox"/> 1. Yes<br><input type="checkbox"/> 2. No<br><input type="checkbox"/> 9. Don't know | <input type="checkbox"/> 1. Modern Medicine<br><input type="checkbox"/> 2. Traditional Medicine<br><input type="checkbox"/> 3. Others (Please specify)..... |
|                                  | <input type="checkbox"/> 2. No  |                      |                                                                                                             |                                                                                                                                                             |
| 4) Sexually Transmitted Diseases | <input type="checkbox"/> 1. Yes | □□                   | <input type="checkbox"/> 1. Yes<br><input type="checkbox"/> 2. No<br><input type="checkbox"/> 9. Don't know | <input type="checkbox"/> 1. Modern Medicine<br><input type="checkbox"/> 2. Traditional Medicine<br><input type="checkbox"/> 3. Others (Please specify)..... |
|                                  | <input type="checkbox"/> 2. No  |                      |                                                                                                             |                                                                                                                                                             |

10.4 Have you ever had "**Diabetes**"

| Diabetes                        | Age of onset (years) | Mode of Treatment                                                                                                                                         |
|---------------------------------|----------------------|-----------------------------------------------------------------------------------------------------------------------------------------------------------|
| <input type="checkbox"/> 1. Yes | □□                   | <input type="checkbox"/> 1. Insulin injections<br><input type="checkbox"/> 2. Oral medication<br><input type="checkbox"/> 3. Others (Please specify)..... |
| <input type="checkbox"/> 2. No  |                      |                                                                                                                                                           |

Study No: □□□□ ID-M: □□□□

**Part 11 History to using hormones and pregnancy (Only for females)**

*(If male skip to Part 12 number 12.1)*

**11.1 Usage of contraceptives or hormones**

| Hormone usage                                                                                                | Objective of Hormone usage                                                                                                                        | Number of times | Frequency of using hormones                                                                                                                            | Type of Hormone Treatment                                                                                                                 | How long did you use? |
|--------------------------------------------------------------------------------------------------------------|---------------------------------------------------------------------------------------------------------------------------------------------------|-----------------|--------------------------------------------------------------------------------------------------------------------------------------------------------|-------------------------------------------------------------------------------------------------------------------------------------------|-----------------------|
| 1) Have you ever taken “contraceptive”?<br><input type="checkbox"/> 1. Yes<br><input type="checkbox"/> 2. No | <input type="checkbox"/> 1. Contraception<br><input type="checkbox"/> 2. Menopause Treatment<br><input type="checkbox"/> 3. Others (Specify)..... | □□              | <input type="checkbox"/> 1. Daily<br><input type="checkbox"/> 2. Weekly<br><input type="checkbox"/> 3. Monthly<br><input type="checkbox"/> 4. Annually | <input type="checkbox"/> 1. Tablet<br><input type="checkbox"/> 2. Injection<br><input type="checkbox"/> 3. Others (Specify).....<br>..... | .....                 |
| 2) Have you ever taken other hormones?<br><input type="checkbox"/> 1. Yes<br><input type="checkbox"/> 2. No  | <input type="checkbox"/> 1. Contraception<br><input type="checkbox"/> 2. Menopause Treatment<br><input type="checkbox"/> 3. Others (Specify)..... | □□              | <input type="checkbox"/> 1. Daily<br><input type="checkbox"/> 2. Weekly<br><input type="checkbox"/> 3. Monthly<br><input type="checkbox"/> 4. Annually | <input type="checkbox"/> 1. Tablet<br><input type="checkbox"/> 2. Injection<br><input type="checkbox"/> 3. Others (Specify).....<br>..... | .....                 |

**11.2 Pregnancy**

| Pregnancy                                                           | Age of first pregnancy             | Total number of pregnancy |
|---------------------------------------------------------------------|------------------------------------|---------------------------|
| 1) Have you ever been pregnancy?<br><input type="checkbox"/> 1. Yes | □□                                 | □□                        |
| <input type="checkbox"/> 2. No                                      | <i>Skip to Part 12 number 12.1</i> |                           |

**Part 12 History of receiving blood, donating blood and history of cancer in the family**

**12.1 Have you ever received blood, (excluding this time)**

| Blood Transfusion                                                                                     | Frequency of “Blood Transfusion”                                                                                                                                         | What was the year of your last transfusion? |
|-------------------------------------------------------------------------------------------------------|--------------------------------------------------------------------------------------------------------------------------------------------------------------------------|---------------------------------------------|
| 1) Have you ever received blood?<br><input type="checkbox"/> 1. Yes<br><input type="checkbox"/> 2. No | <input type="checkbox"/> 1. 1 time<br><input type="checkbox"/> 2. 2-4 times<br><input type="checkbox"/> 3. 5 more than 5 times<br><input type="checkbox"/> 4. Don’t know | B.E 25 □□                                   |

Study No: □□□□ ID-M: □□□□

12.2 Have you ever donated blood?

| Blood donated                  |                                                                   | Frequency of donating blood                                                                                                                                              | When was the time you donated? |
|--------------------------------|-------------------------------------------------------------------|--------------------------------------------------------------------------------------------------------------------------------------------------------------------------|--------------------------------|
| 1) Have you ever donated blood | <input type="checkbox"/> 1. Yes<br><input type="checkbox"/> 2. No | <input type="checkbox"/> 1. 1 time<br><input type="checkbox"/> 2. 2-4 times<br><input type="checkbox"/> 3. 5 more than 5 times<br><input type="checkbox"/> 4. Don't know | B.E 25 □□                      |

12.3 Have you ever had the following experiences?

| Experience                                                                                                                                         | Age of onset (Please specify) | Comment (What you want to let doctor know?) |
|----------------------------------------------------------------------------------------------------------------------------------------------------|-------------------------------|---------------------------------------------|
| 1) Operation (Excluding this time)<br><input type="checkbox"/> 1. Yes <input type="checkbox"/> 2. No                                               | □□                            |                                             |
| 2) Tattoo<br><input type="checkbox"/> 1. Yes <input type="checkbox"/> 2. No                                                                        | □□                            |                                             |
| 3) Body piercing such as tongue, ear<br><input type="checkbox"/> 1. Yes <input type="checkbox"/> 2. No                                             | □□                            |                                             |
| 4) Circumcision<br><input type="checkbox"/> 1. Yes <input type="checkbox"/> 2. No                                                                  | □□                            |                                             |
| 5) Dental operation such as tooth filling, tooth extractor, root canal treatment<br><input type="checkbox"/> 1. Yes <input type="checkbox"/> 2. No | □□                            |                                             |

Study No: □□□□ ID-M: □□□□

12.4 Family history of cancer

| Family history of cancer                                                                                         |                                 | Family member that had cancer                             | Location of cancer |
|------------------------------------------------------------------------------------------------------------------|---------------------------------|-----------------------------------------------------------|--------------------|
| 1) Family member with history of cancer (family member includes grandparent, parents, children or grandchildren) | <input type="checkbox"/> 1. Yes | <input type="checkbox"/> 1. Father                        |                    |
|                                                                                                                  |                                 | <input type="checkbox"/> 2. Mother                        |                    |
|                                                                                                                  |                                 | <input type="checkbox"/> 3. Sibling                       |                    |
|                                                                                                                  |                                 | <input type="checkbox"/> 4. Son/Daughter                  |                    |
|                                                                                                                  |                                 | <input type="checkbox"/> 5. Paternal grandfather          |                    |
|                                                                                                                  |                                 | <input type="checkbox"/> 6. Paternal grandmother          |                    |
|                                                                                                                  |                                 | <input type="checkbox"/> 7. Father's siblings             |                    |
|                                                                                                                  |                                 | <input type="checkbox"/> 8. Maternal grandfather          |                    |
|                                                                                                                  |                                 | <input type="checkbox"/> 9. Maternal grandmother          |                    |
|                                                                                                                  |                                 | <input type="checkbox"/> 10. Mother's siblings            |                    |
|                                                                                                                  |                                 | <input type="checkbox"/> 11. Grandchildren                |                    |
|                                                                                                                  |                                 | <input type="checkbox"/> 12. Others (Please specify)..... |                    |
|                                                                                                                  | <input type="checkbox"/> 2. No  |                                                           |                    |
| <input type="checkbox"/> 9. Don't know/<br>Not sure                                                              |                                 |                                                           |                    |

Date of interview:...../...../ B.E 25.....  
 Name of interview:..... (Print)

**Thank you for your time  
 Research team**
